# Supplementary material for: New “missing link” genus of the colonial volvocine green algae gives insights into the evolution of oogamy
Source: PubMed Central journal article supplement (PMC4015742; doi:10.1186/1471-2148-14-37), 2014-03-03
Supplement: 1471-2148-14-37-S2.pdf [file 1471-2148-14-37-S2.pdf]

## **Additional file 2:**

### **Information S1 and Tables S1 and S2**

**Information S1.** Asexual reproduction, transmission electron microscopy, molecular phylogenetic analyses, and secondary structures of ITS-2 *rDNA*.

#### **Asexual reproduction**

During asexual reproduction of the two new species of *Colemanosphaera* (Additional file: Figure S1), each reproductive cell divided four or five times successively to form a 16- or 32-celled square plakea, respectively. In 8-celled plakea, the protoplasts arranged cruciately, similar to other members of the Volvocaceae [1-3]. The plakea then inverted to form a compact, spheroidal daughter colony. During the cell divisions and inversion, the parental gelatinous matrix gradually expanded and showed an internal vesicle-like structure that encompassed each of the developing embryos as found in *Yamagishiella* [4], *Eudorina* [5], and *Pleodorina* [6]. However, such vesicles were visible only when stained with methylene blue under a light microscope in *Colemanosphaera* (Additional file: Figure S1B,C). Each protoplast of the newly formed daughter colony developed two flagella and subsequently released from the parental colony. In *C. charkowiensis*, flagellar elongation was unequal to produce apparently uniflagellate cells in newly formed daughter colonies (Additional file: Figure S1D), as in *Yamagishiella* and *Eudorina* [1,2,4]. However, two flagella of each protoplast in the newly formed daughter colony grew equally in *C. angeleri* (Additional file: Figure S1E).

#### **Transmission electron microscopy**

Sections of the extracellular matrix of vegetative colonies of the two new species of *Colemanosphaera* revealed the tripartite boundary that surrounded the entire colony (Additional file: Figure S2). This colonial boundary is characteristic of the Volvocaceae [7]. Each cell was tightly enclosed by a fibrillar layer of the matrix (cellular envelope) inside the colonial boundary. In *C. charkowiensis*, the cellular envelope was dense under the transmission electron microscopy (Additional file: Figure S2B). However, that of *C. angeleri* was thin (Additional file: Figure S2D) and sometimes indistinguishable from other fibrillar material of the extracellular matrix inside the colonial boundary. A large cup-shaped chloroplast occupied most of the cell periphery and a nucleus was located in the center of the cell (Additional file: Figure S2A-C). Golgi bodies and mitochondrial profiles were detected within the cytoplasm. The pyrenoid was observed within the chloroplast and surrounded by several starch grains. Thylakoid lamellae penetrated into the

pyrenoid matrix through spaces between starch grains as they became tubular.

### **Molecular phylogenetic analyses**

Based on the 5,523 bp in the five chloroplast genes from 58 operational taxonomic units, four clades were resolved with moderate to high support values (0.98-1.00 posterior probability [PP] based on Bayesian inference [BI] and 63-100% bootstrap values in maximum likelihood [ML] and maximum parsimony [MP] methods) within the Volvocaceae: *Eudorina* group, *Yamagishiella*, *Pandorina-Volvulina* clade, and a clade (VPC clade) composed of *Volvox* sect. *Volvox*, *Platydorina*, and *Colemanosphaera* (Figure 2). However, phylogenetic relationships among these four clades were not well-resolved. *Eudorina* group was composed of *Eudorina*, *Pleodorina*, and *Volvox* species (excluding *Volvox* sect. *Volvox*) [3, 8] and was sister to *Yamagishiella* with only 0.98 PP. The monophyly of the *Pandorina-Volvulina* lineage was supported with high support values (with 1.00 PP based on BI and 95-96% bootstrap values based on ML and MP methods). The VPC clade was supported with moderate support values (with 0.98 PP based on BI and 63-70% bootstrap values based on ML and MP methods). Within the VPC clade, the genus *Colemanosphaera* was sister to *Platydorina* with highest support values (with 1.00 PP based on BI and 100% bootstrap values based on ML and MP calculations).

Phylogenetic relationships resolved based on the ITS region of nuclear *rDNA* (ITS-1, 5.8S *rDNA* and ITS-2) demonstrated that *Colemanosphaera* plus strain ASW05157 were subdivided into two separate clades with 97-100% bootstrap values using the MP and ML methods (Figure 4). One was composed of strains *C. charkowiensis* originating from Japan, whereas the other included a Japanese strain of *C. angeleri* and strain ASW05157 (originating from Regelsbrunn, Austria [9]). Within the aligned region (580 nucleotides) of the ITS region, only a single nucleotide in ITS-1 was different between *C. angeleri* and strain ASW05157.

### **Secondary structures of ITS-2 *rDNA* transcripts**

The present phylogenetic analyses resolved that the two new species of *Colemanosphaera* and strain ASW05157 are closely related, namely, sister taxa (Figures 2 and 4). Thus, base changes in ITS-2 *rDNA* were examined among these algae. No CBC was found between *C. angeleri* and strain ASW05157. However, two CBCs were detected in helix I and helix III between *C. angeleri* (including ASW05157) and *C. charkowiensis* (Additional file: Figure S4). The secondary structures of ITS-2 *rDNA* from *Colemanosphaera* and *P. caudata* are shown (Additional file 1: Figures S5-S7).

**Table S1.** List of strains of *Colemanosphaera* used in this study.

| Species                                        | Strain designation<br>[Accession number<br>of ITS region of<br>nuclear ribosomal<br>DNA] | Origin of strain                                                                                                                                                                    |
|------------------------------------------------|------------------------------------------------------------------------------------------|-------------------------------------------------------------------------------------------------------------------------------------------------------------------------------------|
| <i>C. charkowiensis</i>                        | Isa 7-1<br>(= NIES <sup>a</sup> -3383)<br>[AB905583]                                     | Water sample collected from Lake Isanuma (water temperature 29.8°C; pH 8.2 ; N 35° 55' 19", E 139° 30' 55"), Isanuma, Kawagoe-shi, Saitama in 24 June 2005                          |
|                                                | 2010-0713-E2<br>(= NIES-3384)<br>[AB905580],                                             | Water sample collected from Lake Isanuma (water temperature 26.2°C; pH 7.5 ; N 35° 55' 19", E 139° 30' 55"), Isanuma, Kawagoe-shi, Saitama in 12 July 2010.                         |
|                                                | 2010-0713-E5<br>(= NIES-3385)<br>[ AB905581]                                             |                                                                                                                                                                                     |
|                                                | 2013-0615-IC-3<br>(= NIES-3386)<br>[AB905582],                                           | Water sample collected from a small pond (water temperature 27.0°C; pH 6.3; N 35° 55' 17", E 139° 30' 52") just outside Lake Isanuma, Isanuma, Kawagoe-shi, Saitama in 15 June 2013 |
| 2013-0615-IC-4<br>(= NIES-3387)<br>[AB905584], |                                                                                          |                                                                                                                                                                                     |
| 2013-0615-IC-7<br>(= NIES-3388)<br>[AB905585]  |                                                                                          |                                                                                                                                                                                     |
| <i>C. angeleri</i>                             | 2010-0126-1<br>(= NIES-3382)<br>[AB905586]                                               | Soil sample collected from Lake Isanuma (N 35° 55' 17", E 139° 30' 57"), Isanuma, Kawagoe-shi, Saitama in 20 January 2010                                                           |

<sup>a</sup> Microbial Culture Collection at the Institute for National Environmental Studies (<http://mcc.nies.go.jp/>) [10]

**Table S2.** List of the colonial volvocine taxa/strains included in the phylogenetic analysis (Figure 2) and DDBJ/EMBL/GenBank accession numbers of the five chloroplast genes.

| Taxon                          | Strain designation     | Accession no         |                      |                                  |                      |                                              |
|--------------------------------|------------------------|----------------------|----------------------|----------------------------------|----------------------|----------------------------------------------|
|                                |                        | <i>atpB</i>          | <i>rbcL</i>          | <i>psaA</i>                      | <i>psaB</i>          | <i>psbC</i>                                  |
| Tetrabaenaceae                 |                        |                      |                      |                                  |                      |                                              |
| <i>Tetrabaena socialis</i>     | NIES <sup>a</sup> -571 | AB014014             | D63443               | AB014015                         | AB044466             | AB044525                                     |
| <i>Basichlamys sacculifera</i> | NIES-566               | AB014015             | D63430               | AB014016                         | AB044467<br>AB044468 | AB044526                                     |
| Goniaceae                      |                        |                      |                      |                                  |                      |                                              |
| <i>Gonium pectorale</i>        | NIES-569               | AB014016<br>AB014017 | D63437               | AB044242                         | AB044463             | AB044521                                     |
| <i>Gonium octonarium</i>       | NIES-851               | AB014018             | D63436               | AB044241                         | AB044462             | AB044520                                     |
| <i>Gonium quadratum</i>        | NIES-653               | AB014019             | D63438               | AB044243                         | AB044464             | AB044522<br>AB044523                         |
| <i>Gonium multicocum</i>       | UTEX <sup>b</sup> 2580 | AB014020             | D63435               | AB044239<br>AB044240             | AB044461             | AB044481                                     |
| <i>Gonium multicocum</i>       | UTEX 783               | AB076115<br>AB076116 | AB076102<br>AB076103 | AB076102                         | AB076153<br>AB076154 | AB076168<br>AB076169<br>AB076170<br>AB076171 |
| <i>Gonium viridistellatum</i>  | UTEX 2519              | AB014021             | D86831               | AB044244                         | AB044465             | AB044524                                     |
| <i>Gonium viridistellatum</i>  | NIES-857               | AB076117             | AB076092<br>AB076093 | AB076139                         | AB076155             | AB076172                                     |
| <i>Gonium viridistellatum</i>  | NIES-289               | AB076118<br>AB076119 | AB076091             | AB076140<br>AB076141             | AB076156             | AB076173                                     |
| Volvocaceae                    |                        |                      |                      |                                  |                      |                                              |
| <i>Pandorina morum</i>         | NIES-574               | AB014025<br>AB014036 | D63442               | AB044226                         | AB044452             | AB044505                                     |
| <i>Pandorina morum</i>         | UTEX 854               | AB044180             | AB044167             | AB044231                         | AB044456             | AB044511<br>AB044510                         |
| <i>Pandorina morum</i>         | UTEX 880               | AB044179             | AB044166             | AB044229<br>AB044230             | AB044455             | AB044509                                     |
| <i>Pandorina morum</i>         | UTEX 1727              | AB044178             | AB044165             | AB04428                          | AB044454             | AB044508                                     |
| <i>Pandorina morum</i>         | UTEX 2326              | AB044177             | AB044164             | AB044227                         | AB044453             | AB044506<br>AB044507                         |
| <i>Pandorina colemaniae</i>    | NIES-572               | AB014027             | D63441               | AB044232                         | AB044457             | AB044512                                     |
| <i>Volvolina pringsheimii</i>  | UTEX 1020              | AB014028             | D63444d              | AB044220                         | AB044447             | AB044499                                     |
| <i>Volvolina steinii</i>       | UTEX 1525              | AB044174             | AB044160             | AB044223                         | AB044449             | AB044501                                     |
| <i>Volvolina steinii</i>       | UTEX 1531              | AB044175             | AB044161             | AB044224                         | AB044450             | AB044502<br>AB044503                         |
| <i>Volvolina steinii</i>       | NIES-545               | AB044173             | AB044159             | AB044221<br>AB044222             | AB044448             | AB044500                                     |
| <i>Volvolina boldii</i>        | UTEX 2185              | AB044176             | AB044162<br>AB044163 | AB044225                         | AB044451             | AB044504                                     |
| <i>Volvolina compacta</i>      | NIES-582               | AB014029             | D86832               | AB044217<br>AB044218<br>AB044219 | AB044446             | AB044498                                     |
| <i>Yamagishiella unicocca</i>  | UTEX 2428              | AB014030             | D86823               | AB044213                         | AB044443             | AB044495                                     |
| <i>Yamagishiella unicocca</i>  | UTEX 2430              | AB014031             | D86825f              | AB044214<br>AB044215             | AB044444             | AB044496                                     |
| <i>Yamagishiella unicocca</i>  | NIES-872               | AB044172             | AB044168             | AB044216                         | AB044445             | AB044497                                     |

|                                      |                              |                      |          |                                              |                      |                      |
|--------------------------------------|------------------------------|----------------------|----------|----------------------------------------------|----------------------|----------------------|
| <i>Platydorina caudata</i>           | UTEX 1658                    | AB014032             | D86828   | AB044211<br>AB044212                         | AB044442             | AB044494             |
| <i>Colemanosphaera charkowiensis</i> | Isa 7-1<br>(= NIES-3383)     | AB905589             | AB905591 | AB905593                                     | AB905595             | AB905597             |
| <i>Colemanosphaera angeleri</i>      | 2010-0126-1<br>(= NIES-3382) | AB905590             | AB905592 | AB905594                                     | AB9055956            | AB905598             |
| <i>Eudorina cylindrica</i>           | UTEX 1197                    | AB014033             | D86833   | AB044210                                     | AB044441             | AB044493             |
| <i>Eudorina peripheralis</i>         | UTEX 1215 <sup>c</sup>       | AB014007             | D63434   | AB044207<br>AB044208<br>AB044209             | AB044440             | AB044491<br>AB044492 |
| <i>Eudorina unicocca</i>             | UTEX 737                     | AB014008             | D86829   | AB044204<br>AB044205<br>AB044206             | AB044439             | AB044489<br>AB044490 |
| <i>Eudorina elegans</i>              | NIES-456                     | AB014009             | D63432   | AB044199                                     | AB044435             | AB044485             |
| <i>Eudorina elegans</i>              | UTEX 1205                    | AB014010             | D88805   | AB044200<br>AB044201                         | AB044436<br>AB044437 | AB044486             |
| <i>Eudorina elegans</i>              | UTEX 1212                    | AB014012             | D88806   | AB044202<br>AB044203                         | AB044438             | AB044487<br>AB044488 |
| <i>Eudorina illinoisensis</i>        | NIES-460                     | AB014013             | D63433   | AB0440198                                    | AB044434             | AB044484             |
| <i>Pleodorina thompsonii</i>         | UTEX 2804                    | AB214407             | AB214408 | AB214410<br>AB214411                         | AB214412             | AB214413             |
| <i>Pleodorina starrii</i>            | NIES-1362                    | AB214424             | AB214427 | AB214430                                     | AB214432             | AB214434             |
| <i>Pleodorina indica</i>             | UTEX 1990                    | AB014006             | D86834   | AB044195<br>AB044196<br>AB044197             | AB044432<br>AB044433 | AB044483             |
| <i>Pleodorina japonica</i>           | UTEX 2523                    | AB014005             | D63440   | AB044193<br>AB044194                         | AB044431             | AB044482             |
| <i>Pleodorina californica</i>        | UTEX 809                     | AB014004             | D63439   | AB044190<br>AB044191<br>AB044192             | AB044430             | AB044480             |
| <i>Volvox gigas</i>                  | UTEX 1895                    | AB076112             | AB076084 | AB076131<br>AB076132                         | AB076150             | AB076165             |
| <i>Volvox ovalis</i>                 | NIES-2569                    | AB592341             | AB592342 | AB592339                                     | AB592340             | AB592338             |
| <i>Volvox obversus</i>               | UTEX 1865                    | AB076113             | AB076085 | AB076133<br>AB076134<br>AB076135<br>AB076136 | AB076151             | AB076166             |
| <i>Volvox africanus</i>              | UTEX 1891                    | AB076114             | AB076101 | AB076137                                     | AB076152             | AB076167             |
| <i>Volvox tertius</i>                | UTEX 132                     | AB076106<br>AB076107 | AB076098 | AB076125<br>AB076126                         | AB076147             | AB076162             |
| <i>Volvox tertius</i>                | NIES-544                     | AB086173             | AB086174 | AB086175<br>AB086176                         | AB086177             | AB086178             |
| <i>Volvox powersii</i>               | UTEX 1863                    | AB214414             | AB214415 | AB214416                                     | AB214417             | AB214418             |
| <i>Volvox carteri</i>                |                              |                      |          |                                              |                      |                      |
| f. <i>kawasakiensis</i>              | NIES-732                     | AB013999             | D63446   | AB044184<br>AB044185                         | AB044425             | AB044475             |
| f. <i>nagariensis</i>                | UTEX 1885                    | AB076108<br>AB075109 | AB076099 | AB076127<br>AB076128                         | AB076148             | AB076163             |
| f. <i>weismannia</i>                 | UTEX 1875                    | AB076110<br>AB076111 | AB076100 | AB076129<br>AB076130                         | AB076149             | AB076164             |
| <i>Volvox aureus</i>                 | NIES-541                     | AB013998             | D63445   | AB044182                                     | AB044424             | AB04447              |
| <i>Volvox aureus</i>                 | NIES-891                     | AB076104             | AB076096 | AB076123                                     | AB076145             | AB076160             |
| <i>Volvox aureus</i>                 | NIES-892                     | AB076105             | AB076086 | AB076124                                     | AB076146             | AB076161             |

|                           |             |          |          |          |          |          |
|---------------------------|-------------|----------|----------|----------|----------|----------|
| <i>Volvox dissipatrix</i> | UTEX 2184   | AB014000 | D63447   | AB044183 | AB044426 | AB044476 |
| <i>Volvox dissipatrix</i> | Marb.2RS 29 | AB214419 | AB214420 | AB214421 | AB214422 | AB214423 |
| <i>Volvox rousseletii</i> | UTEX 1862   | AB014003 | D63448   | AB044188 | AB044429 | AB044479 |
| <i>Volvox barberi</i>     | UTEX 804    | AB014001 | D86835   | AB044186 | AB044427 | AB044477 |
| <i>Volvox globator</i>    | UTEX 955    | AB014002 | D86836   | AB044187 | AB044428 | AB044478 |

<sup>a</sup> Microbial Culture Collection at the Institute for National Environmental Studies (<http://mcc.nies.go.jp/>) [10]

<sup>b</sup> Culture Collection of Algae at the University of Texas at Austin (<http://web.biosci.utexas.edu/utex/default.aspx>) [11]

<sup>c</sup> Re-identified by Yamada et al. [12]

## References

1. Goldstein M: **Speciation and mating behaviour in *Eudorina***. *J Protozool* 1964, **11**:317-344.
2. Nozaki H, Ito M: **Phylogenetic relationships within the colonial Volvocales (Chlorophyta) inferred from cladistic analysis based on morphological data**. *J Phycol* 1994, **30**:353–365.
3. Nozaki H, Ott FD, Coleman AW: **Morphology, molecular phylogeny and taxonomy of two new species of *Pleodorina* (Volvoceae, Chlorophyceae)**. *J Phycol* 2006, **42**:1072-1080.
4. Nozaki H: **The life history of Japanese *Pandorina unicocca* (Chlorophyta, Volvocales)**. *J Jpn Bot* 1981, **56**: 65-72, pls. 1-2.
5. Nozaki H, Krienitz L: **Morphology and phylogeny of *Eudorina minodii* (Chodat) Nozaki et Krienitz, comb. nov. (Volvocales, Chlorophyta) from Germany**. *Eur J Phycol* 2001, **36**: 23-8.
6. Nozaki H, Kuroiwa H, Mita T, Kuroiwa T: ***Pleodorina japonica* sp. nov. (Volvocales, Chlorophyta) with bacteria-like endosymbionts**. *Phycologia* 1989, **28**: 252-267.
7. Nozaki H, Kuroiwa T: **Ultrastructure of the extracellular matrix and taxonomy of *Eudorina*, *Pleodorina* and *Yamagishiella* gen. nov. (Volvocaceae, Chlorophyta)**. *Phycologia* 1992, **31**: 529-541.
8. Nozaki H, Misawa K, Kajita T, Kato M, Nohara S, Watanabe MM: **Origin and evolution of the colonial Volvocales (Chlorophyceae) as inferred from multiple, chloroplast gene sequences**. *Mol Phylogenet Evol* 2000, **17**: 256–268.
9. Angeler DG, Schager M, Coleman AW: **Phylogenetic relationships among isolates of *Eudorina* species (Volvocales, Chlorophyta) inferred from molecular and biochemical data**. *J Phycol* 2002, **35**: 815-823.
10. Kasai F, Kawachi M, Erata M, Mori F, Yumoto K, Sato M, Ishimoto M (Eds): **NIES-Collection. List of Strains. 8th Edition**. *Jpn J Phycol* 2009, **57** (1), Supplement: 1-350, pls. 1-7.
11. Starr RC, Zeikus JA: **UTEX--The Culture Collection of Algae at The University of Texas at Austin**. *J Phycol* 1993, **29** (suppl.):1-106.
12. Yamada TK, Miyaji K, Nozaki H: **A taxonomic study of *Eudorina unicocca* (Volvocaceae, Chlorophyceae) and related species, based on morphology and molecular phylogeny**. *Eur J Phycol* 2008, **43**:317-326.
